# Supplementary figures and images for: Single-cell RNA Sequencing Reveals Thoracolumbar Vertebra Heterogeneity and Rib-genesis in Pigs
Source: PubMed Central journal article supplement — Genomics Proteomics Bioinformatics. 2021 Nov 11;19(3):423–36. doi: 10.1016/j.gpb.2021.09.008 (PMC8864194; doi:10.1016/j.gpb.2021.09.008), 2021-11-11

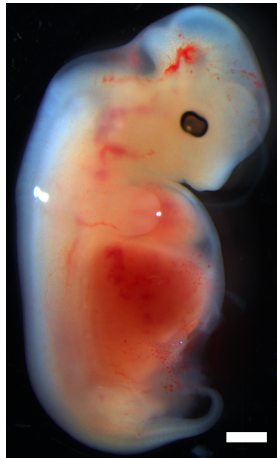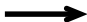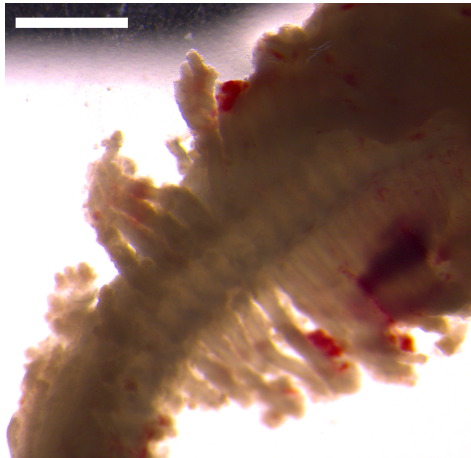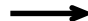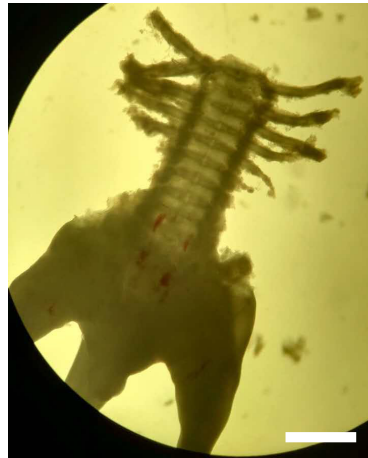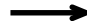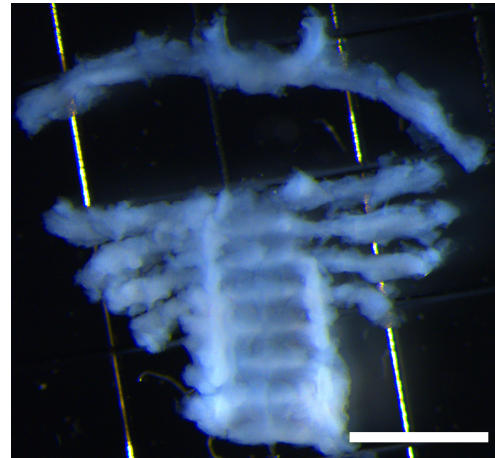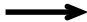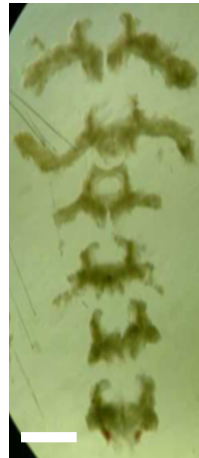

Supplement: mmc1.pdf [file mmc1.pdf]

**A LV**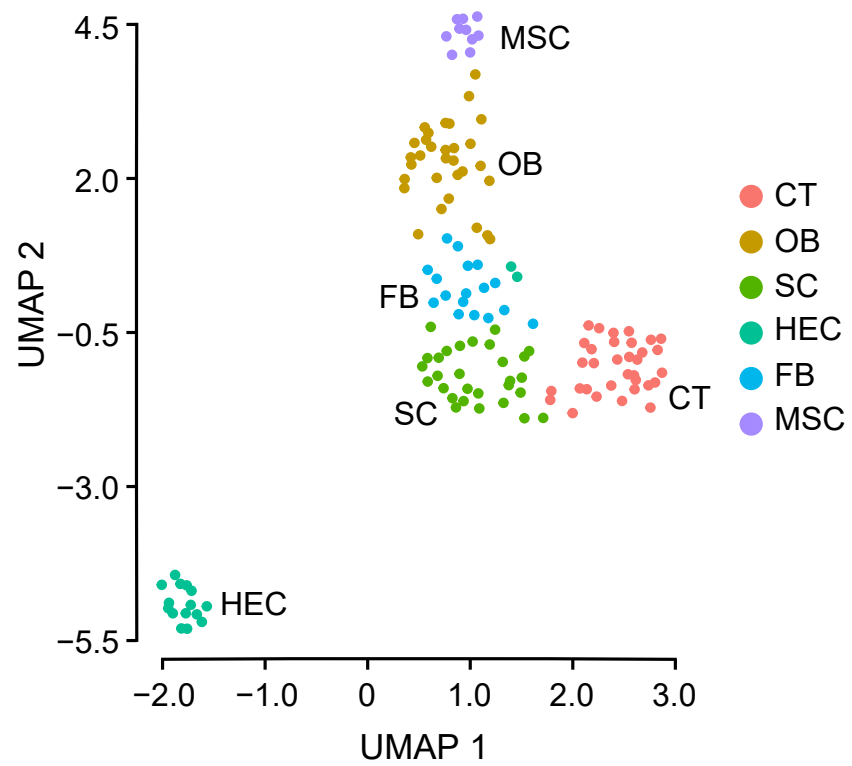**B LV**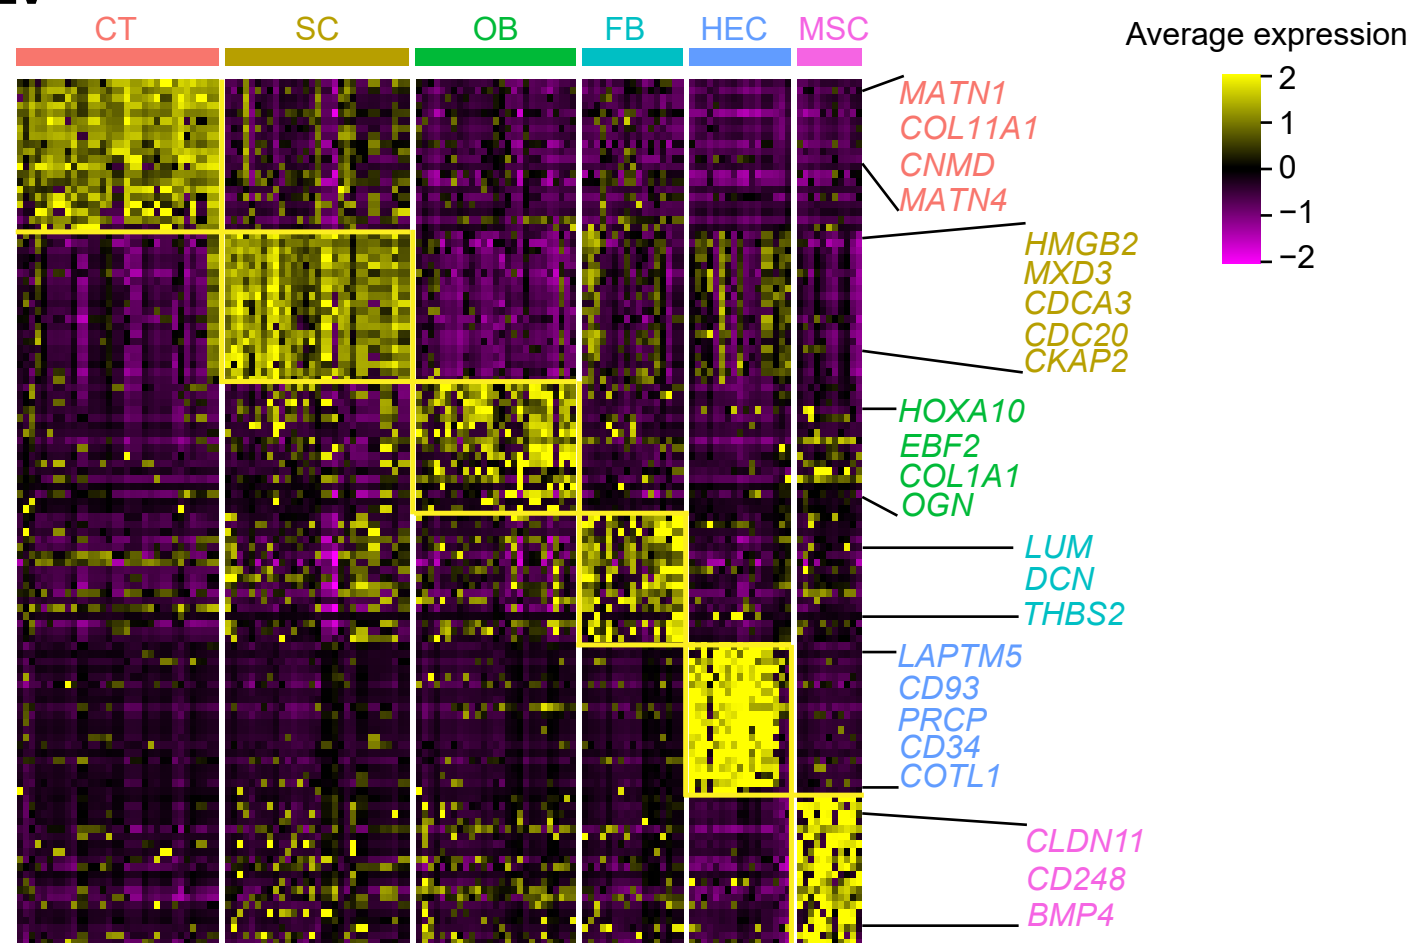**C TV**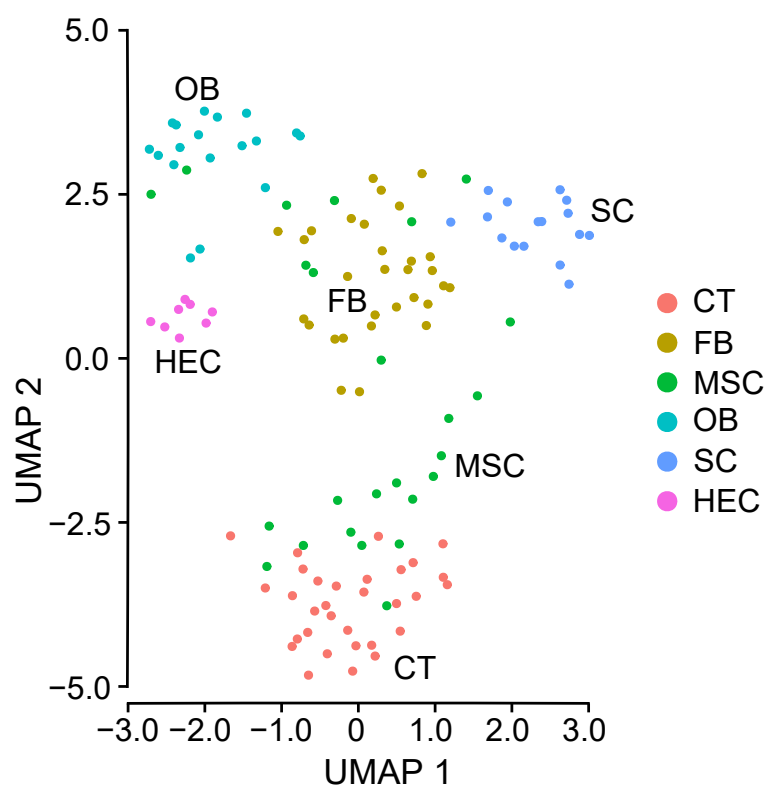**D TV**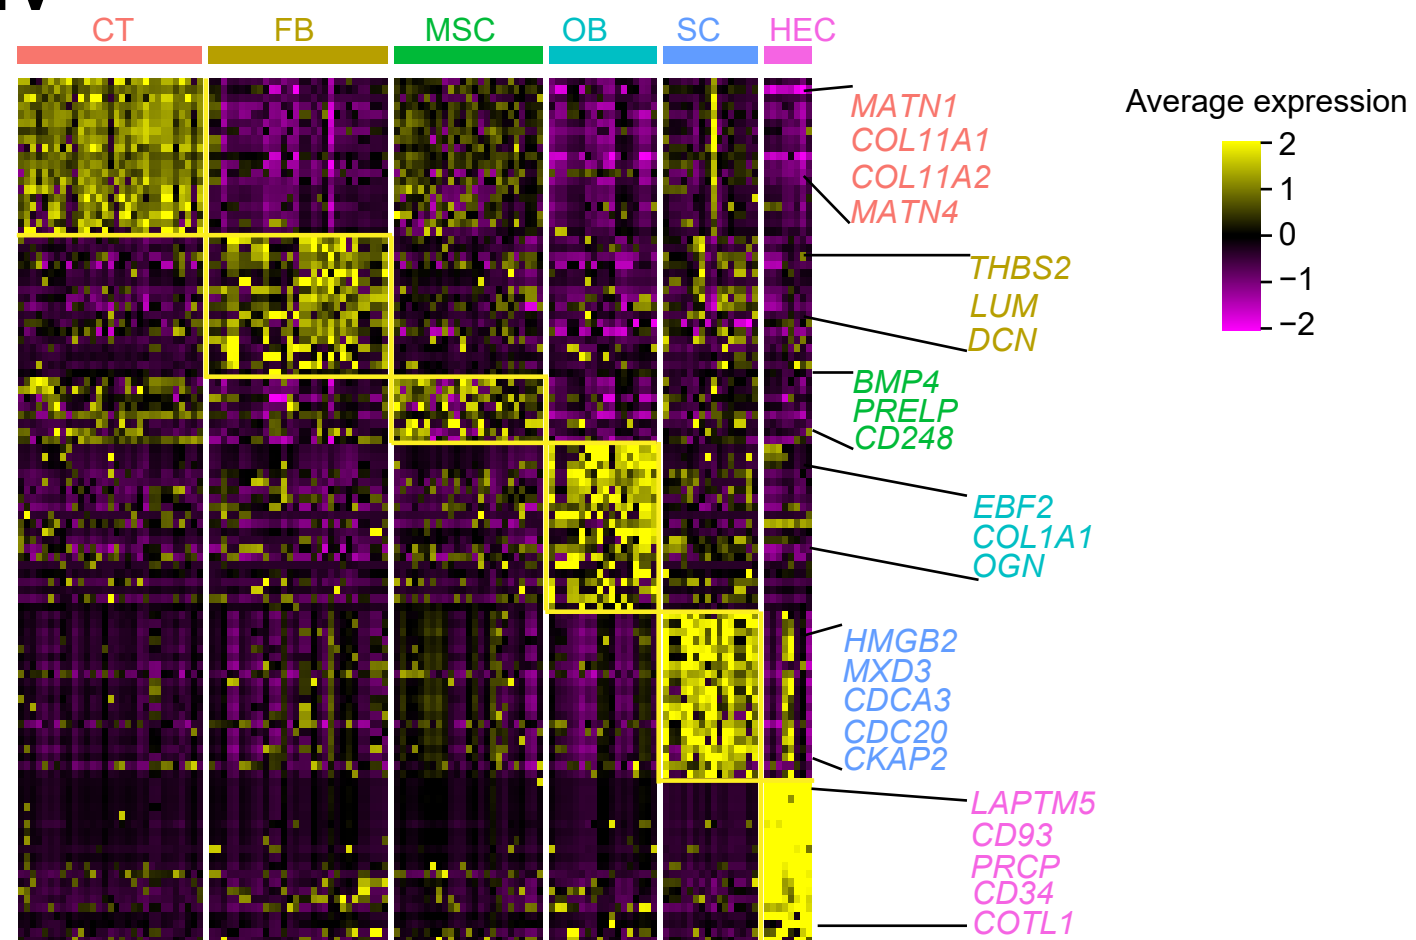

Supplement: mmc2.pdf [file mmc2.pdf]
